# Supplementary material for: dz2 orbital-mediated bound magnetic polarons in ferromagnetic Ce-doped BaTiO3 nanoparticles and their enriched two-photon absorption cross-section
Source: Royal Society of Chemistry journal article supplement (doi:10.1039/c8cp06055j), 2019-01-01
Supplement: c8cp06055j1.pdf [file c8cp06055j1.pdf]

## Supporting Information

# $d_{z^2}$ Orbitals Mediated Bound Magnetic Polarons in Ferromagnetic Ce Doped BaTiO<sub>3</sub> Nanoparticles and its Enriched Two Photon Absorption Cross Section

P. Senthilkumar<sup>a</sup>, S. Dhanuskodi<sup>a\*</sup>, J. Karthikeyan<sup>b</sup> and P. Murugan<sup>b</sup>

<sup>a</sup>Nonlinear Optical Materials Laboratory, School of Physics, Bharathidasan University

Tiruchirappalli 620024, Tamil Nadu, India

<sup>b</sup>Functional Materials Division, CSIR Central Electrochemical Research Institute

Karaikudi 630006, Tamil Nadu, India

\*Email:dhanus2k3@yahoo.com

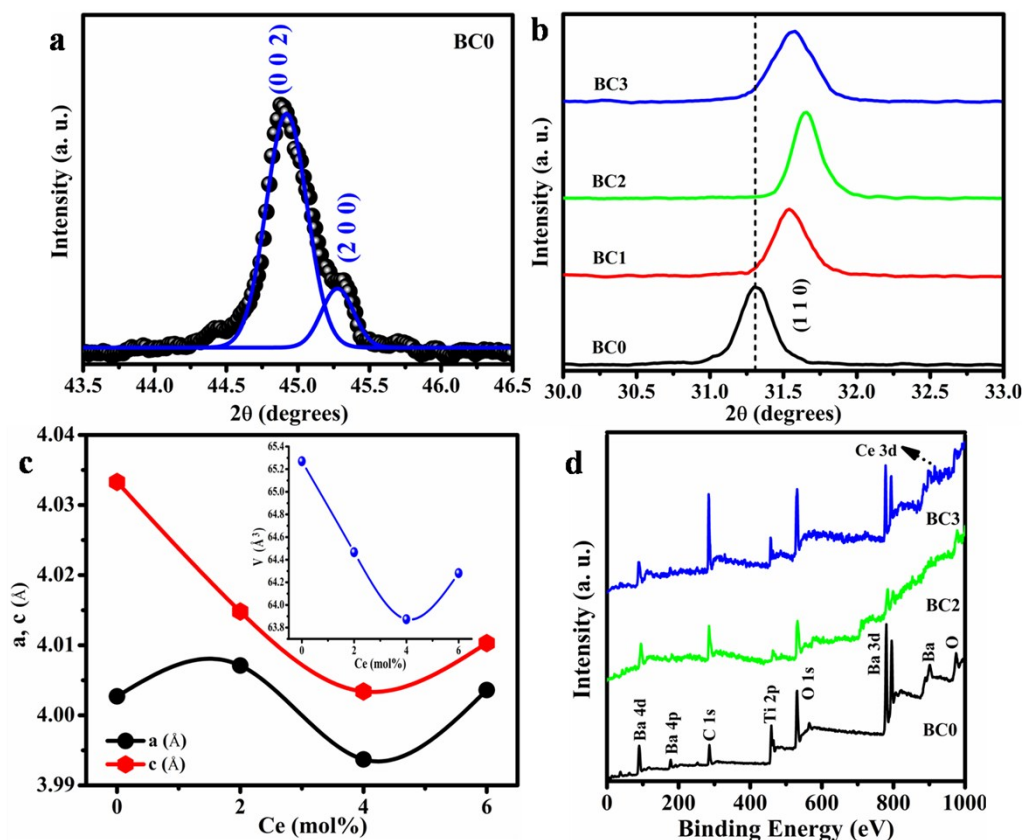

**Fig. S1.** (a) Appearance of tetragonal (0 0 2) plane with (2 0 0) (b) shifting of prominent (1 1 0) diffraction peak (c) the variation of lattice parameters (*a*, *c* and *V*) as a function Ce concentration (d) XPS survey spectra of pristine and Ce doped BT nanoparticles.

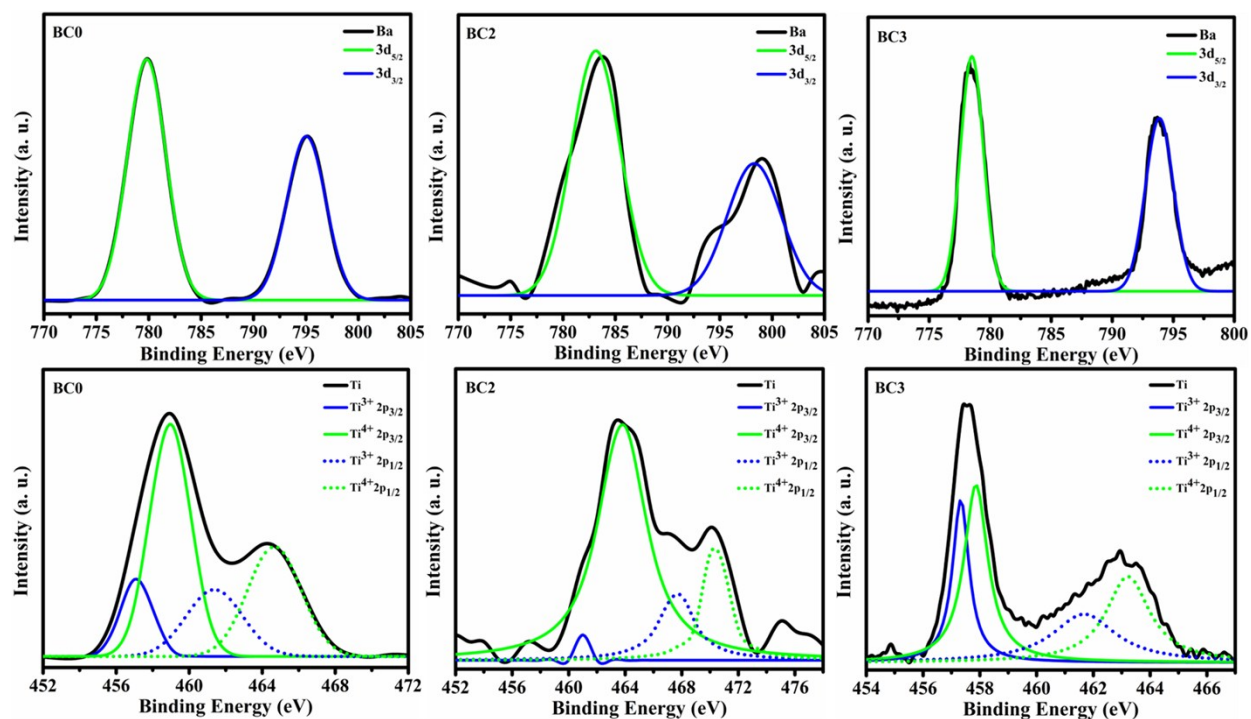

Fig. S2. XPS high resolution scans of Ba-3d and Ti-2p spectra of BC0, BC2 and BC3 samples.

| Sample | Binding Energy (eV) |                   |                   |                   |                |                |                |
|--------|---------------------|-------------------|-------------------|-------------------|----------------|----------------|----------------|
|        | Ti <sup>4+</sup>    |                   | Ti <sup>3+</sup>  |                   | O-1s           |                |                |
|        | 2p <sub>3/2</sub>   | 2p <sub>1/2</sub> | 2p <sub>3/2</sub> | 2p <sub>1/2</sub> | L <sub>o</sub> | V <sub>o</sub> | S <sub>o</sub> |
| BC0    | 458.9               | 464.4             | 457.1             | 461.4             | 528.9          | 530.7          | 531.9, 534.1   |
| BC2    | 464.0               | 470.0             | 461.0             | 468.0             | 530.2          | 532.2          | 533.8, 535.2   |
| BC3    | 457.9               | 463.2             | 457.3             | 461.7             | 528.9          | 531.4          | 532.9          |

Table S1. XPS binding energies of Ti-2p and O-1s core levels of pristine and Ce doped BT nanoparticles.

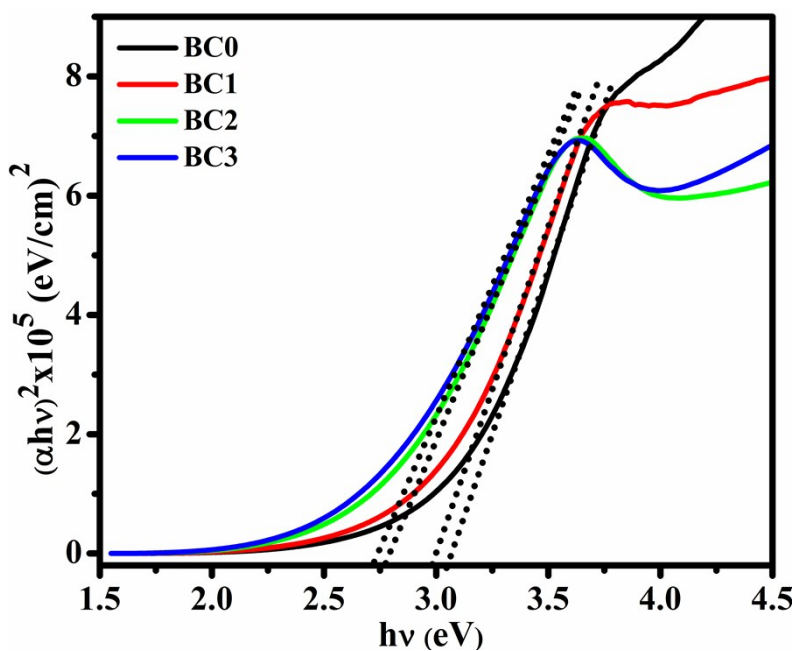

Fig. S3. Tauc plot of pristine and Ce doped BT samples.

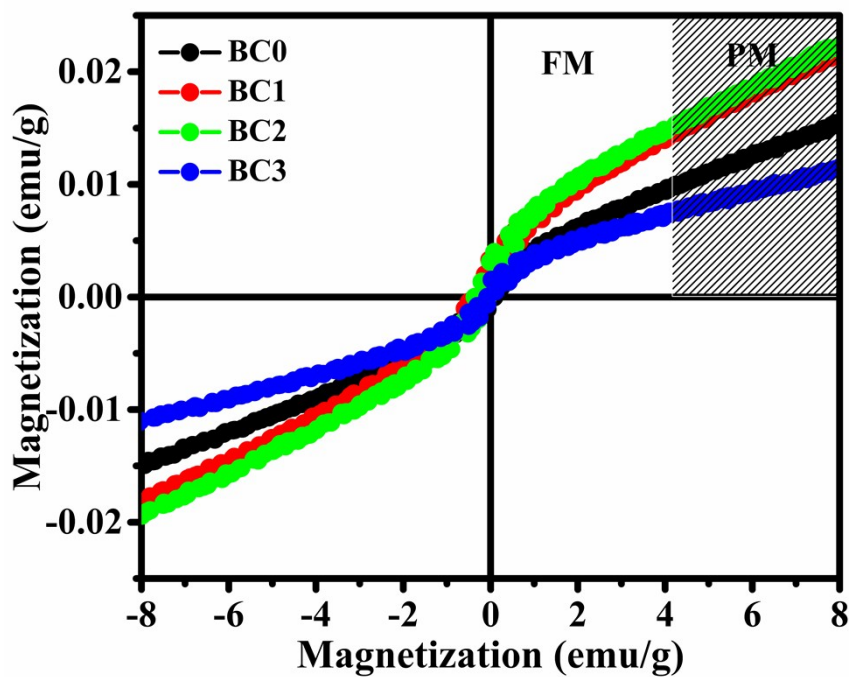

Fig. S4. Room temperature M-H data of pristine and Ce doped BT nanoparticles before the paramagnetic deduction.

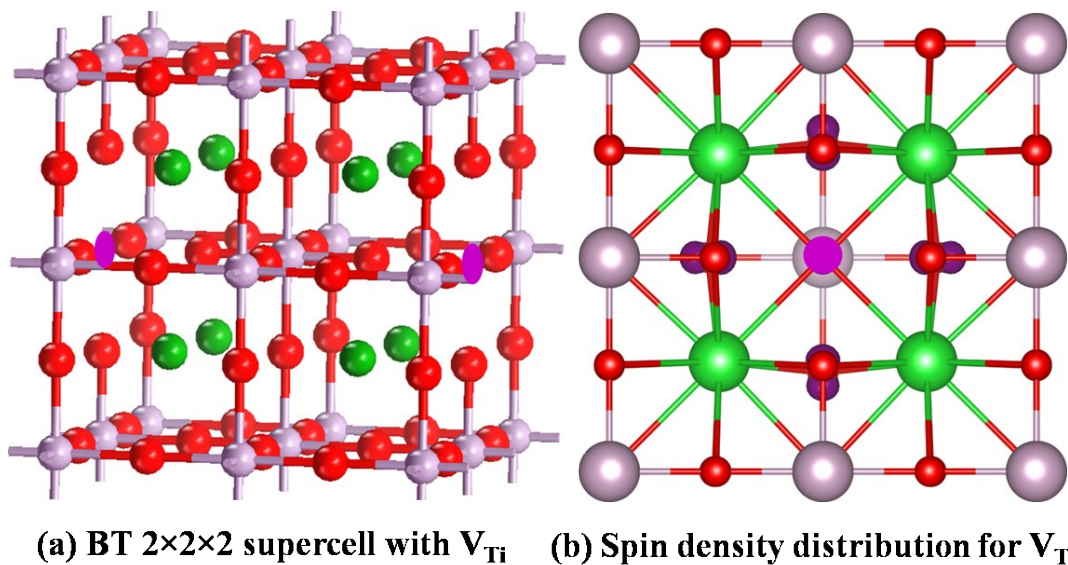

**Fig. S5.** (a) BT 2×2×2 supercell (spherical balls showing Gray-Ti atoms, Green-Ba atoms, Red-O atoms, Magenta-Ti vacancies) (b) spin density distribution for Ti vacancies (the isosurface value  $0.02 e/\text{\AA}^3$ ).

### Optical Nonlinearity Investigations

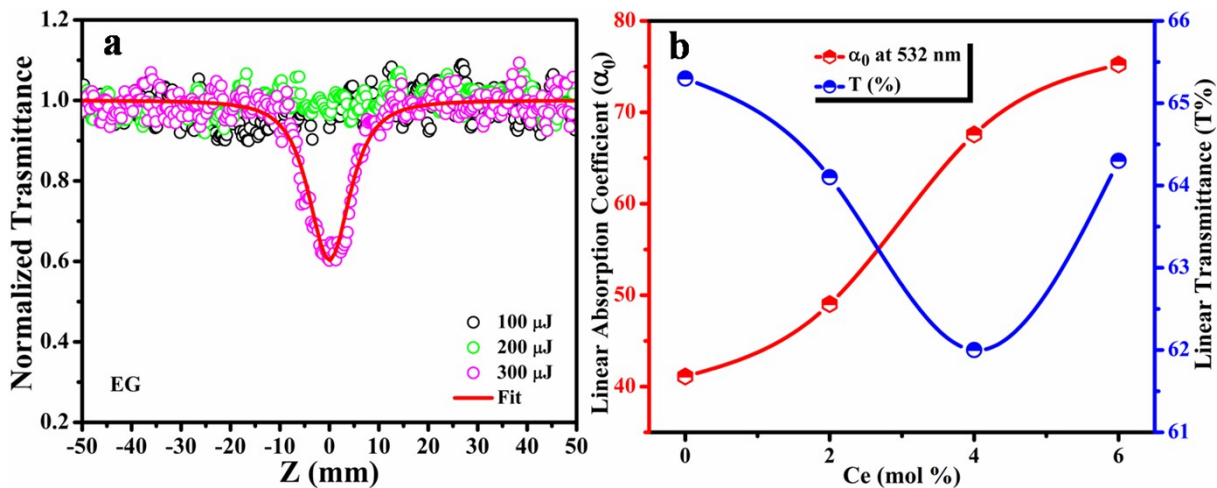

**Fig. S6.** (a) Open aperture Z-Scan curves of ethylene glycol at different input energies (b) the variation of linear absorption coefficient ( $\alpha_0$ ) at 532 nm and linear transmittance (T) as a function of Ce concentration.

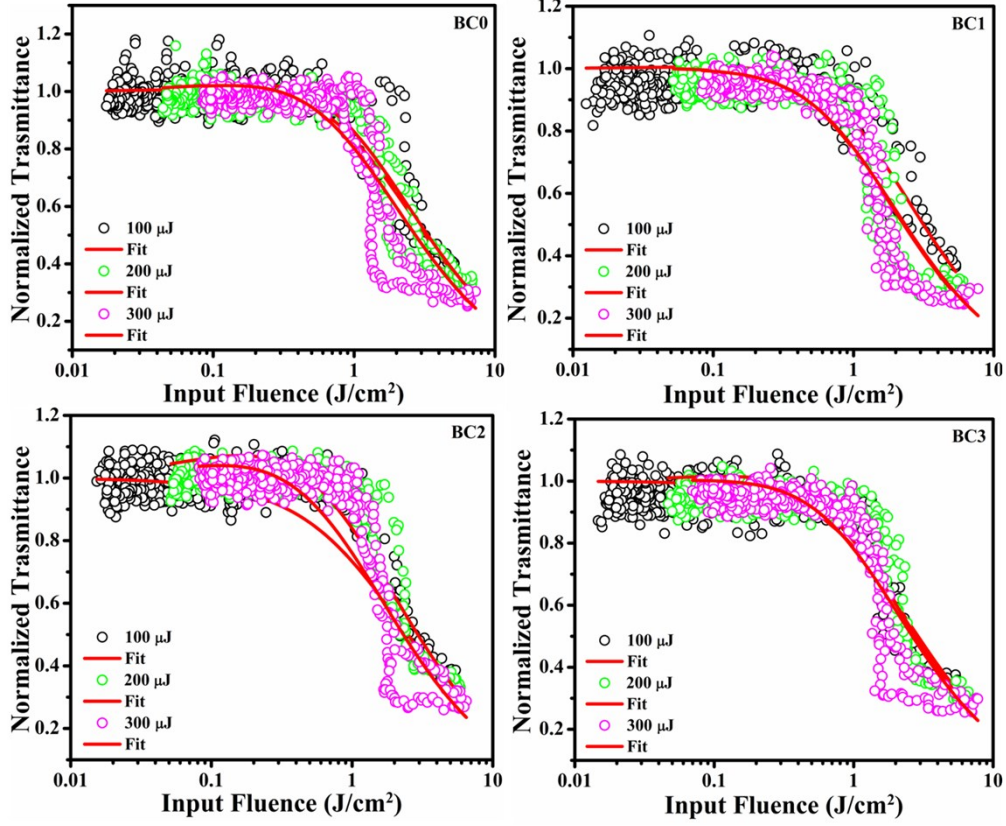

**Fig. S7.** Optical limiting curves of Ce doped BT nanoparticles at different input energies, spherical balls are experimental data and solid lines are numerical fitting with the nonlinear equations.

### The estimation of $\sigma_{TPA}$ , $\sigma_{GS}$ and $\tau$ ,

In the present work, optical absorption of the materials lies between 300 – 600 nm so that the TPA transitions exist under the excitation of 532 nm and the two state rate equations are,

$$\frac{dN_0}{dt} = -\frac{\sigma_{TPA} I^2}{2h\omega_0} N_0 + \frac{1}{\tau} N_1 \quad (1)$$

$$\frac{dN_1}{dt} = \frac{\sigma_{TPA} I^2}{2h\omega_0} N_0 - \frac{1}{\tau} N_1 \quad (2)$$

Here,  $N_0$  and  $N_1$  are the ground and excited state carrier density respectively. The total carrier density  $N$  is evaluated from,

$$N = \frac{\text{Sample Concentration} * \text{Avogadro Number}}{\text{Molecular Weight}} \quad (3)$$

TPA cross section ( $\sigma_{TPA}$ ), the ground state absorption cross section ( $\sigma_{GS}$ ) and excited state life time ( $\tau$ ) are calculated using the upcoming relations,

$$\sigma_{TPA} = \frac{hc\beta_{TPA}}{N\lambda} \quad (4)$$

$$\sigma_{GS} = \frac{-\log T_0}{NL} \quad (5)$$

$$\tau = \frac{hc}{\lambda\sigma_{GS}I_s} \quad (6)$$

Here,  $c$ ,  $\lambda$ ,  $T_0$  and  $N$  are speed of light, wavelength, normalized transmittance in the linear regime and total number of active molecules ( $5.939 \times 10^{17} \text{cm}^{-3}$ ) respectively.

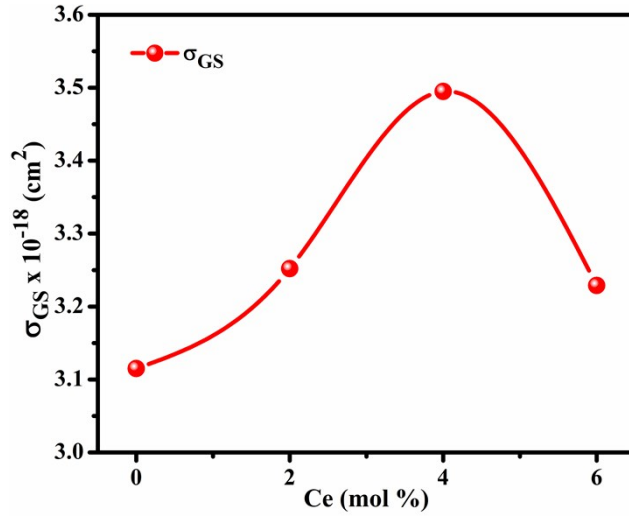

**Fig. S8.** Ground state absorption cross section ( $\sigma_{GS}$ ) as a function of Ce concentration.
